# Supplementary material for: Draft genome of spinach and transcriptome diversity of 120 Spinacia accessions
Source: PubMed Central journal article supplement (PMC5458060; doi:10.1038/ncomms15275), 2017-05-24
Supplement: ncomms15275-s1.pdf [file ncomms15275-s1.pdf]

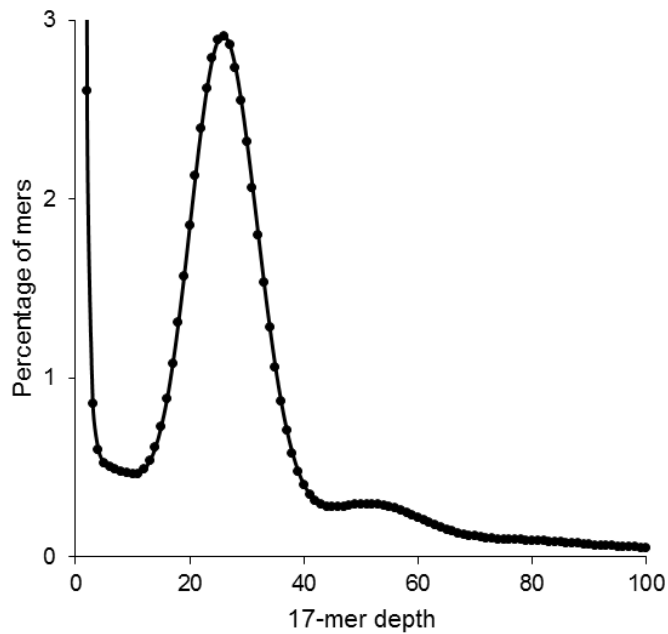

**Supplementary Figure 1. 17-mer depth distribution of the Illumina reads.** Illumina reads from the 1-kb insert library were used in the analysis. A total of 26,234,801,500 17-mers were obtained and the peak depth was 26. Spinach genome size was estimated to be 1,009,030,827 bp, based on the formula: Total number of K mer/Position of peak depth =  $26,234,801,500 / 26 = 1,009,030,827$  bp.

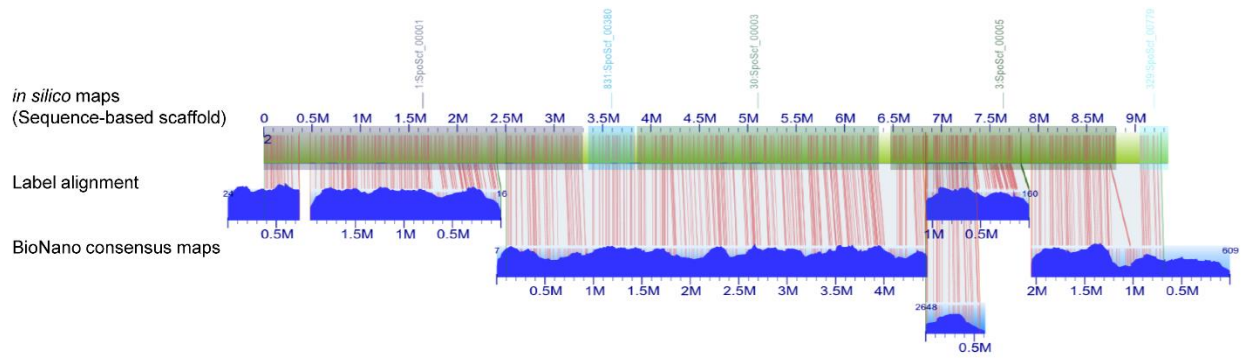

**Supplementary Figure 2. Example of alignments between *in silico* maps (scaffolds) and BioNano consensus maps.** This example shows the largest super-scaffold, which consists of five scaffolds (SpoScf\_00001, SpoScf\_00380, SpoScf\_00003, SpoScf\_00005, and SpoScf\_00779).

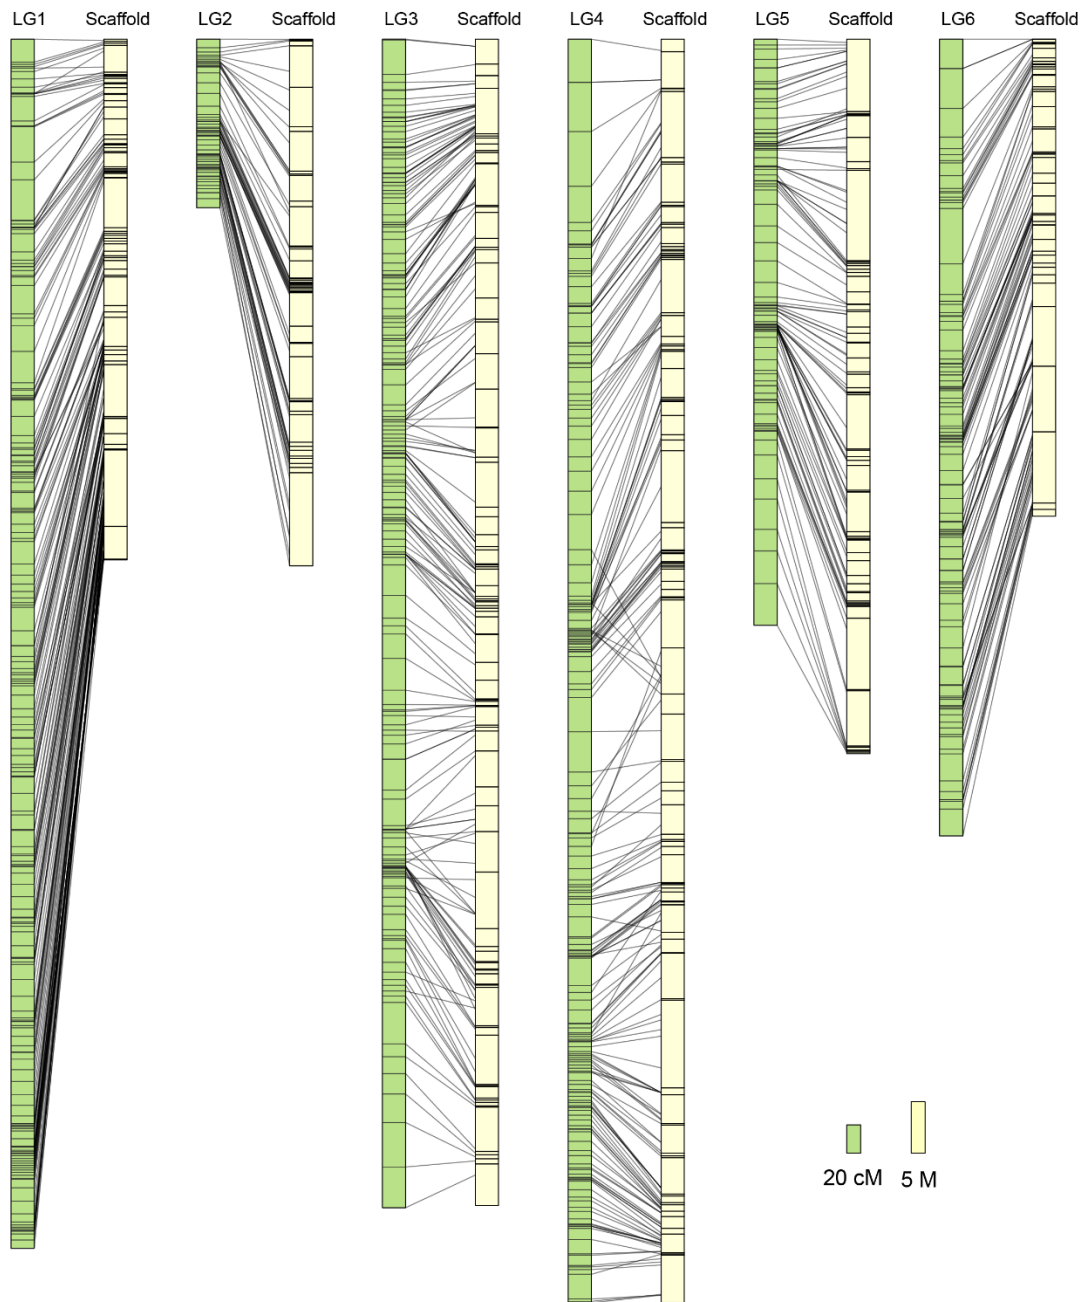

**Supplementary Figure 3. Anchoring the spinach genome assembly to the reference genetic map.** A total of 463 Mb spinach genome scaffolds (yellow) were anchored to the six linkage groups (green) with 870 SNP markers.

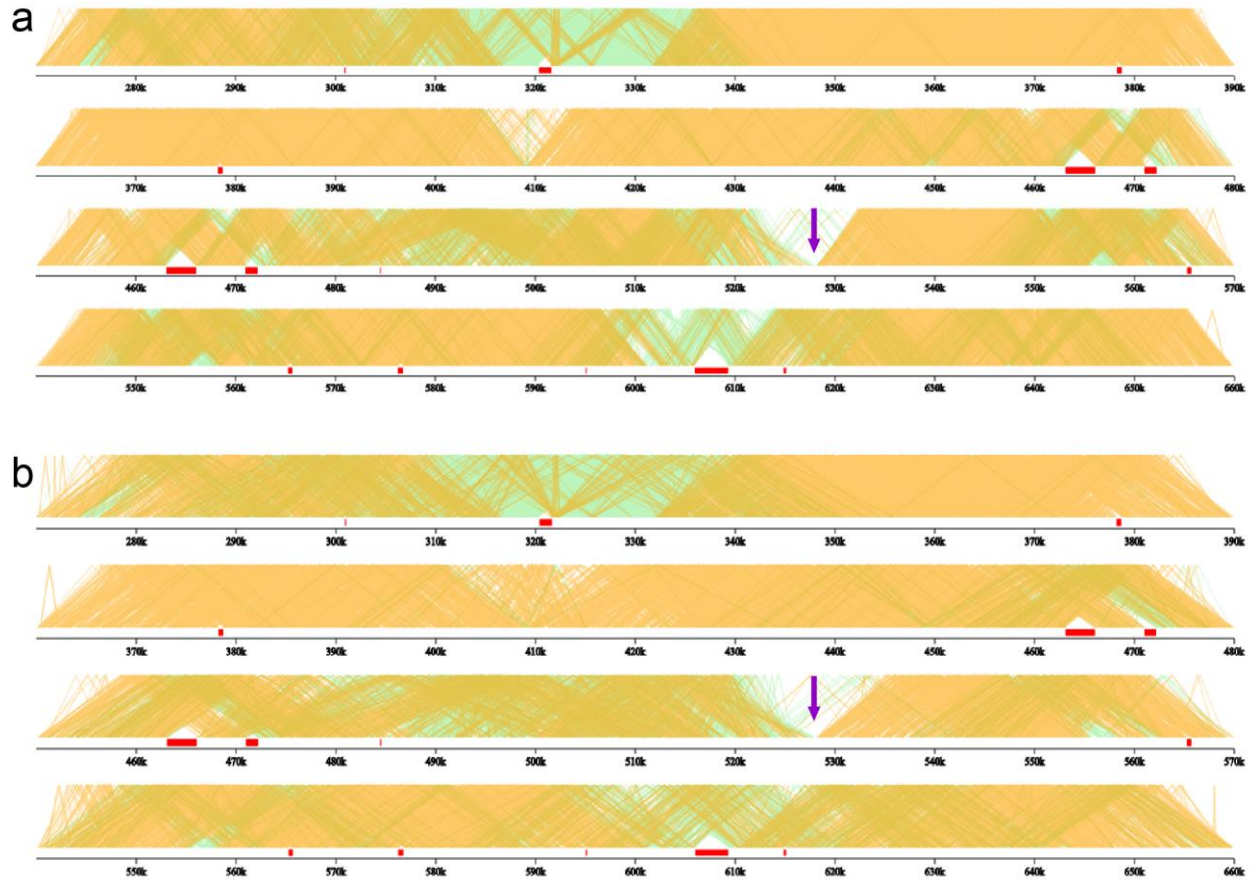

**Supplementary Figure 4. Example of alignments of mate-pate reads from the 10-kb (a) and 15-kb (b) insert libraries to a scaffold (SpoScf\_00179) that showed inconsistency with the linkage groups. Break point (pointed by arrows) suggested by the genetic map was supported by the alignments. Yellow lines indicate unique alignments while green lines show multiple alignments. Red bars indicated the gapped regions in the scaffold.**

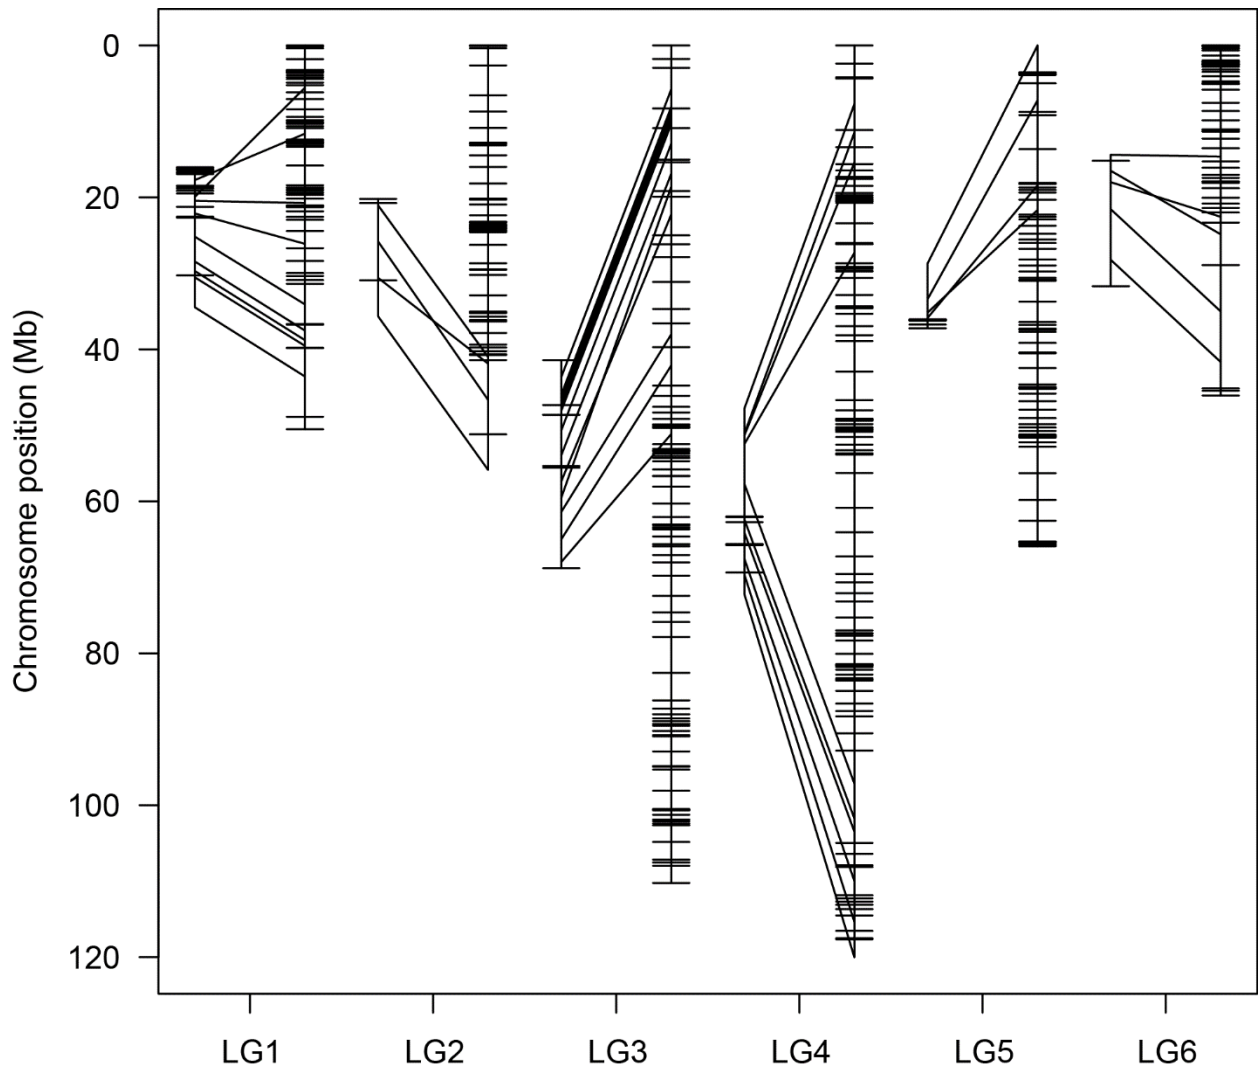

**Supplementary Figure 5. Comparison of spinach genome anchoring using a published genetic map (Chan-Navarrete et al., 2016; left) and the map generated under this study (right). Horizontal bars indicate scaffolds that were anchored only to one of the two maps, and scaffolds present in both maps are linked with lines.**

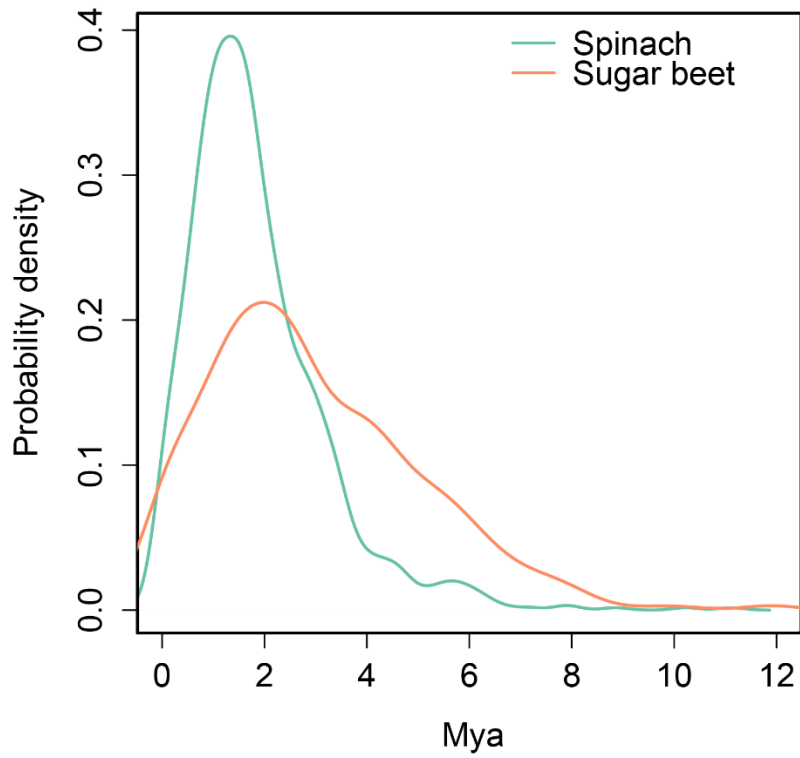

**Supplementary Figure 6. Distribution of LTR insertion time of spinach and sugar beet.** The probability density of LTR insertion time was estimated using the ‘density’ function in R. Mya: million years ago.

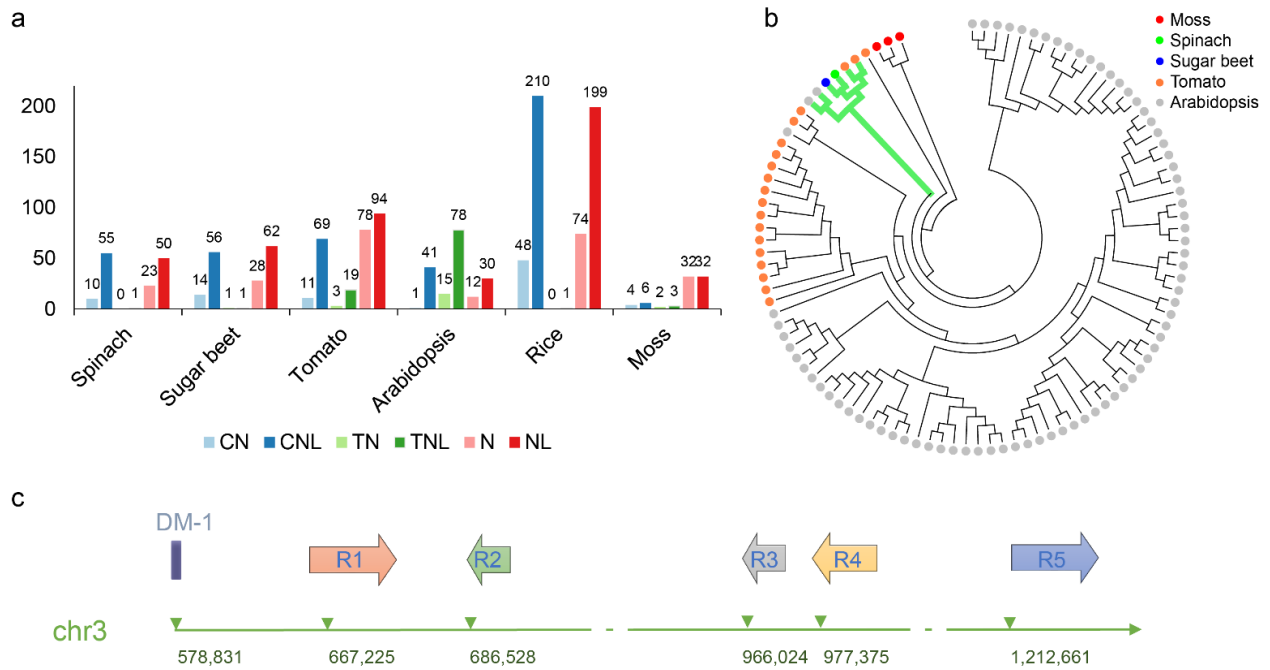

**Supplementary Figure 7. NBS R genes in spinach and other five plant genomes. (a)** Classification of NBS R genes in six plant genomes. CN: CC-NBS; CNL: CC-NBS-LRR; TN: TIR-NBS; TNL: TIR-NBS-LRR; N: NBS; NL: NBS-LRR. **(b)** Phylogenetic tree of TNLs. The clade highlighted in green consists of the common TNLs in four eudicots. The tree was generated using protein sequences of the conserved NB-ARC domain. **(c)** Genome region of the DM-1 marker tightly linked to downy mildew resistance. R1-R5 correspond to R genes *Spo12736*, *Spo12784*, *Spo12903*, *Spo12905* and *Spo12821*, respectively.

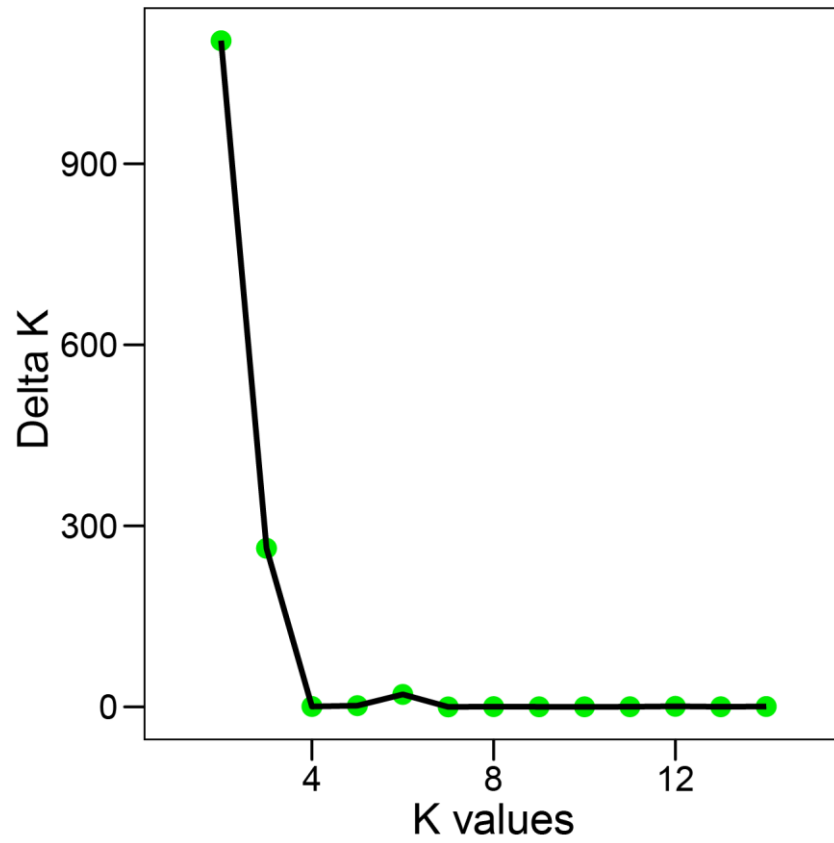

**Supplementary Figure 8.  $\Delta K$  analysis for different number of clusters ( $K$ ) for the spinach population consisting of 120 accessions.**



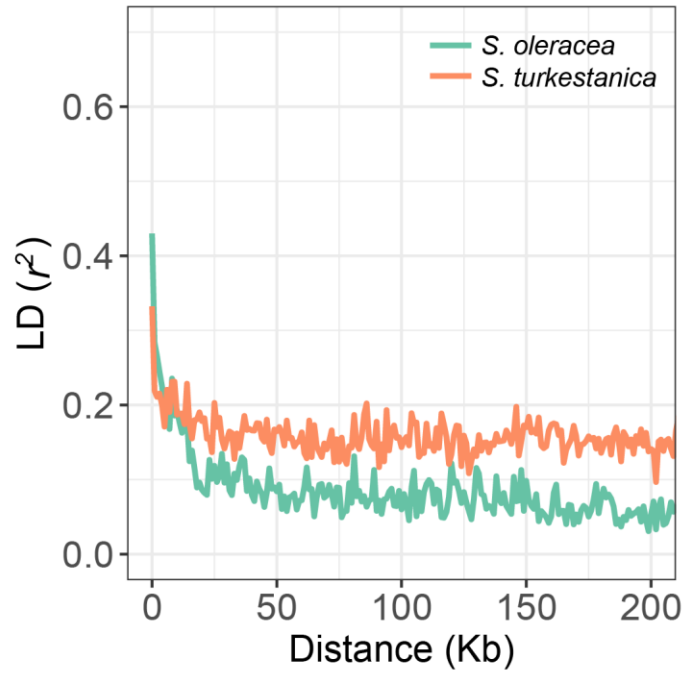

**Supplementary Figure 9. LD decay determined by squared correlations of allele frequencies ( $r^2$ ) against physical distance (kb) between polymorphic sites in cultivated (*S. oleracea*) and wild spinach (*S. turkestanica*).**

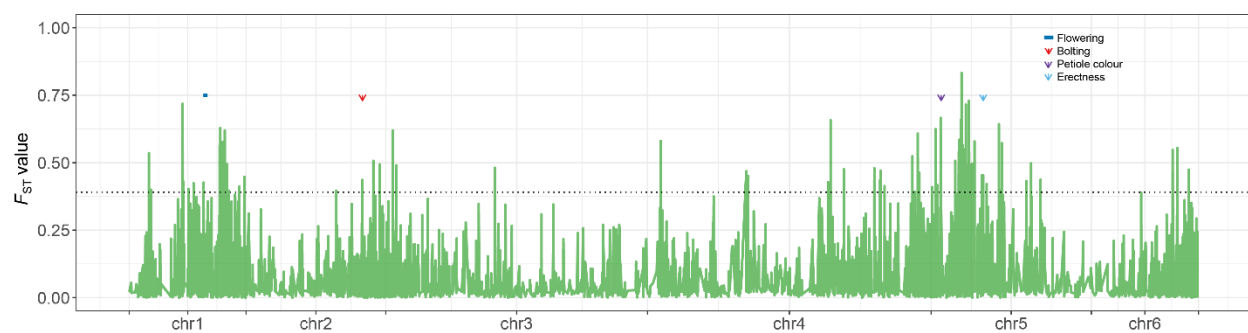

**Supplementary Figure 10. Genome-wide distribution of  $F_{ST}$  values between *S. oleracea* and *S. turkestanica*.** The horizontal dashed line indicates the top 1% threshold. Arrows and the short interval indicate positions of known SNP markers and QTL, respectively, for different traits.

**Supplementary Table 1. Summary of spinach genome sequencing data.**

| Library type | Library insert size | Read length | Raw data             |                        | Cleaned data         |                        | Depth         |
|--------------|---------------------|-------------|----------------------|------------------------|----------------------|------------------------|---------------|
|              |                     |             | No. Reads            | Total bases            | No. Reads            | Total bases            |               |
| Paired-end   | 150 bp              | 151         | 218,321,078          | 32,966,482,778         | 185,735,392          | 22,677,346,322         | 22.47         |
|              | 200 bp              | 150         | 160,125,228          | 24,018,784,200         | 139,538,642          | 20,042,276,909         | 19.86         |
|              | 300 bp              | 150         | 310,319,806          | 46,547,970,900         | 277,300,292          | 39,821,177,481         | 39.46         |
|              | 500 bp              | 150         | 238,442,978          | 35,766,446,700         | 210,052,456          | 30,113,139,215         | 29.84         |
|              | 1 kb                | 150         | 219,784,748          | 32,967,712,200         | 203,927,628          | 29,497,794,666         | 29.23         |
| Mate-pair    | 3-5 kb              | 150         | 147,464,858          | 22,119,728,700         | 90,828,046           | 10,816,700,919         | 10.72         |
|              | 8-10 kb             | 150         | 168,854,710          | 25,328,206,500         | 86,191,412           | 9,757,240,510          | 9.67          |
|              | 15-20 kb            | 150         | 159,372,606          | 23,905,890,900         | 60,457,894           | 6,792,434,624          | 6.73          |
| <b>Total</b> |                     |             | <b>1,622,686,012</b> | <b>243,621,222,878</b> | <b>1,254,031,762</b> | <b>169,518,110,646</b> | <b>168.00</b> |

**Supplementary Table 2. Classification of repetitive sequence identified in spinach genome.**

| Class                     | Family         | Subfamily          | Count          | Masked (bp) | Masked (%) |       |
|---------------------------|----------------|--------------------|----------------|-------------|------------|-------|
| TEs                       | LTR            | Caulimovirus       | 25             | 26,527      | 0.00       |       |
|                           |                | Copia              | 232,040        | 211,625,571 | 25.47      |       |
|                           |                | ERV1               | 752            | 309,021     | 0.04       |       |
|                           |                | ERV4               | 106            | 102,270     | 0.01       |       |
|                           |                | ERVK               | 839            | 475,253     | 0.06       |       |
|                           |                | ERVL               | 96             | 72,432      | 0.01       |       |
|                           |                | Gypsy              | 226,830        | 228,869,104 | 27.55      |       |
|                           |                | Ngaro              | 42             | 3,892       | 0.00       |       |
|                           |                | Pao                | 2,701          | 1,695,276   | 0.20       |       |
|                           |                | Others             | 28,777         | 26,941,544  | 3.24       |       |
|                           | Class I        | LINE               | CRE-II         | 2,415       | 2,269,190  | 0.27  |
|                           |                |                    | I              | 446         | 240,244    | 0.03  |
|                           |                |                    | Jockey         | 4,845       | 1,750,041  | 0.21  |
|                           |                |                    | L1             | 27,422      | 19,131,990 | 2.30  |
|                           |                |                    | L1-Tx1         | 134         | 23,562     | 0.00  |
|                           |                |                    | R1             | 309         | 88,555     | 0.01  |
|                           |                |                    | R2             | 103         | 35,023     | 0.00  |
|                           |                |                    | RTE-BovB       | 1,363       | 291,969    | 0.04  |
|                           |                |                    | Tad1           | 359         | 104,960    | 0.01  |
|                           |                |                    | SINE           | ID          | 47         | 4,621 |
|                           | tRNA-Core      | 91                 |                | 13,133      | 0.00       |       |
|                           | tRNA-L2        | 317                |                | 43,065      | 0.01       |       |
|                           | tRNA-RTE       | 1,217              |                | 164,799     | 0.02       |       |
|                           | Others         | 509                |                | 181,679     | 0.02       |       |
|                           | Class II       | DNA                | CMC-Chapaev    | 2,641       | 2,548,498  | 0.31  |
|                           |                |                    | CMC-EnSpm      | 40,560      | 15,097,821 | 1.82  |
|                           |                |                    | CMC-Transib    | 334         | 95,946     | 0.01  |
|                           |                |                    | Dada           | 39          | 6,938      | 0.00  |
|                           |                |                    | Ginger         | 30          | 6,833      | 0.00  |
|                           |                |                    | MULE-MuDR      | 2,505       | 1,661,526  | 0.20  |
|                           |                |                    | Maverick       | 897         | 719,376    | 0.09  |
|                           |                |                    | MuLE-MuDR      | 10,102      | 6,632,465  | 0.80  |
|                           |                |                    | PIF-Harbinger  | 2,468       | 944,677    | 0.11  |
|                           |                |                    | PIF-ISL2EU     | 48          | 5,811      | 0.00  |
|                           |                |                    | PiggyBac       | 107         | 33,380     | 0.00  |
|                           |                |                    | TcMar-Stowaway | 47,335      | 9,652,860  | 1.16  |
| hAT                       |                |                    | 3,060          | 746,899     | 0.09       |       |
| hAT-Ac                    |                |                    | 19,357         | 8,702,711   | 1.05       |       |
| hAT-Tag1                  |                |                    | 6,398          | 1,734,632   | 0.21       |       |
| hAT-Tip100                |                |                    | 2,651          | 867,613     | 0.10       |       |
| Others                    |                |                    | 2,770          | 754,051     | 0.09       |       |
| MITE                      |                |                    | 102,617        | 24,175,497  | 2.91       |       |
| Helitron                  |                |                    | 1,549          | 897,226     | 0.11       |       |
| Unknown                   |                |                    | 144,131        | 43,656,767  | 5.25       |       |
| <b>Total interspersed</b> | <b>921,384</b> | <b>613,405,248</b> | <b>73.83</b>   |             |            |       |
| Satellite                 | 1,143          | 313,648            | 0.04           |             |            |       |
| Simple repeat             | 14,346         | 4,709,928          | 0.57           |             |            |       |
| <b>Total</b>              | <b>936,873</b> | <b>618,428,824</b> | <b>74.43</b>   |             |            |       |

**Supplementary Table 3. Statistics of protein-coding genes in spinach and sugar beet**

| Category         | Gene    |            | CDS     |            | Exon    |            |
|------------------|---------|------------|---------|------------|---------|------------|
|                  | Spinach | Sugar beet | Spinach | Sugar beet | Spinach | Sugar beet |
| Number           | 25,495  | 26,923     | 25,495  | 26,923     | 134,932 | 120,208    |
| Mean length      | 5,717   | 5,392      | 1,157   | 1,057      | 219     | 237        |
| Max length       | 181,202 | 142,131    | 16,230  | 16,314     | 8,286   | 7,551      |
| Min length       | 108     | 140        | 96      | 3          | 1       | 3          |
| Mean exon number | 5       | 4          | NA      | NA         | NA      | NA         |

**Supplementary Table 4. Functional annotation of spinach protein coding genes.**

| <b>Databases</b>    | <b>No.<br/>matched</b> | <b>%matched</b> |
|---------------------|------------------------|-----------------|
| GenBank nr          | 21,964                 | 86.15           |
| TrEMBL Plant        | 21,072                 | 82.65           |
| Swiss-Prot Plant    | 14,759                 | 57.89           |
| TAIR10              | 19,206                 | 75.33           |
| Interpro            | 19,620                 | 76.96           |
| Pfam                | 18,725                 | 73.45           |
| Blast2GO nr         | 17,744                 | 69.60           |
| Pathway (Metacyc)   | 2,717                  | 10.66           |
| Blast2GO nr with EC | 4,333                  | 17.00           |

**Supplementary Table 5. Summary of transcription factors in spinach and other six plant genomes**

| TF families  | Spinach | Sugar<br>beet | Tomato | Grape | Watermelon | Arabidopsis | Rice |
|--------------|---------|---------------|--------|-------|------------|-------------|------|
| AP2/ERF-AP2  | 10      | 10            | 22     | 15    | 16         | 13          | 14   |
| AP2/ERF-ERF  | 75      | 74            | 140    | 81    | 125        | 124         | 139  |
| AP2/ERF-RAV  | 3       | 3             | 3      | 1     | 4          | 4           | 4    |
| Alfin-like   | 4       | 4             | 10     | 6     | 6          | 7           | 9    |
| B3           | 60      | 44            | 74     | 29    | 31         | 66          | 54   |
| B3-ARF       | 14      | 14            | 22     | 17    | 15         | 22          | 27   |
| BBR-BPC      | 4       | 4             | 6      | 5     | 4          | 7           | 4    |
| BES1         | 6       | 7             | 9      | 6     | 6          | 8           | 6    |
| BSD          | 1       | 1             | 1      | 1     | 0          | 2           | 0    |
| C2C2-CO-like | 9       | 7             | 13     | 6     | 11         | 16          | 11   |
| C2C2-Dof     | 22      | 21            | 33     | 22    | 36         | 36          | 30   |
| C2C2-GATA    | 20      | 16            | 30     | 19    | 22         | 30          | 25   |
| C2C2-LSD     | 3       | 3             | 3      | 3     | 4          | 3           | 5    |
| C2C2-YABBY   | 7       | 7             | 9      | 7     | 8          | 6           | 8    |
| C2H2         | 61      | 76            | 116    | 76    | 100        | 106         | 121  |
| C3H          | 50      | 56            | 62     | 49    | 46         | 57          | 57   |
| CAMTA        | 3       | 4             | 6      | 4     | 4          | 6           | 6    |
| CPP          | 5       | 5             | 4      | 6     | 4          | 8           | 11   |
| CSD          | 3       | 4             | 5      | 2     | 3          | 4           | 2    |
| DBB          | 4       | 4             | 5      | 6     | 6          | 3           | 8    |
| DBP          | 3       | 3             | 3      | 4     | 2          | 2           | 4    |
| E2F-DP       | 4       | 4             | 8      | 7     | 6          | 8           | 7    |
| EIL          | 3       | 4             | 9      | 2     | 4          | 6           | 9    |
| FAR1         | 56      | 21            | 28     | 19    | 3          | 17          | 5    |
| GARP-ARR-B   | 7       | 6             | 11     | 10    | 9          | 9           | 6    |
| GARP-G2-like | 29      | 28            | 53     | 39    | 37         | 41          | 46   |
| GRAS         | 27      | 28            | 54     | 43    | 37         | 34          | 60   |
| GRF          | 9       | 8             | 13     | 8     | 8          | 9           | 12   |
| GeBP         | 3       | 2             | 11     | 1     | 7          | 20          | 17   |
| HB-BELL      | 9       | 9             | 14     | 12    | 10         | 13          | 13   |
| HB-HD-ZIP    | 24      | 23            | 50     | 30    | 39         | 42          | 40   |
| HB-KNOX      | 4       | 5             | 8      | 8     | 8          | 8           | 9    |
| HB-PHD       | 0       | 2             | 2      | 2     | 2          | 2           | 1    |
| HB-WOX       | 10      | 8             | 10     | 11    | 11         | 16          | 14   |
| HB-other     | 8       | 8             | 21     | 10    | 8          | 11          | 14   |
| HRT          | 1       | 1             | 1      | 1     | 1          | 2           | 1    |
| HSF          | 16      | 17            | 26     | 19    | 24         | 24          | 25   |
| LFY          | 1       | 1             | 1      | 1     | 1          | 1           | 1    |

|              |             |             |             |             |             |             |             |
|--------------|-------------|-------------|-------------|-------------|-------------|-------------|-------------|
| LIM          | 5           | 4           | 11          | 6           | 8           | 6           | 6           |
| LOB          | 30          | 23          | 47          | 44          | 36          | 43          | 36          |
| MADS-M-type  | 25          | 16          | 74          | 18          | 18          | 69          | 37          |
| MADS-MIKC    | 27          | 27          | 31          | 36          | 21          | 39          | 35          |
| MYB          | 77          | 67          | 140         | 139         | 111         | 142         | 117         |
| MYB-related  | 45          | 40          | 76          | 53          | 50          | 58          | 65          |
| NAC          | 59          | 52          | 96          | 71          | 79          | 111         | 135         |
| NF-X1        | 2           | 2           | 2           | 3           | 2           | 2           | 2           |
| NF-YA        | 6           | 6           | 10          | 7           | 7           | 10          | 11          |
| NF-YB        | 10          | 10          | 27          | 15          | 10          | 13          | 13          |
| NF-YC        | 5           | 8           | 16          | 5           | 7           | 14          | 16          |
| NOZZLE       | 0           | 0           | 0           | 1           | 1           | 1           | 0           |
| OFP          | 15          | 12          | 24          | 8           | 17          | 17          | 31          |
| PLATZ        | 8           | 8           | 21          | 13          | 10          | 12          | 15          |
| RWP-RK       | 9           | 7           | 10          | 8           | 8           | 14          | 12          |
| S1Fa-like    | 1           | 1           | 1           | 2           | 2           | 3           | 2           |
| SAP          | 1           | 1           | 2           | 1           | 1           | 1           | 0           |
| SBP          | 20          | 12          | 17          | 19          | 16          | 17          | 19          |
| SRS          | 5           | 4           | 8           | 5           | 9           | 10          | 5           |
| STAT         | 1           | 1           | 1           | 1           | 1           | 2           | 1           |
| TCP          | 17          | 15          | 36          | 15          | 27          | 24          | 20          |
| TUB          | 5           | 5           | 11          | 13          | 9           | 11          | 15          |
| Tify         | 7           | 6           | 17          | 15          | 11          | 15          | 17          |
| Trihelix     | 23          | 22          | 25          | 23          | 26          | 26          | 26          |
| ULT          | 0           | 0           | 3           | 1           | 2           | 2           | 2           |
| VOZ          | 2           | 2           | 2           | 2           | 2           | 2           | 2           |
| WRKY         | 53          | 45          | 81          | 59          | 57          | 73          | 94          |
| Whirly       | 2           | 2           | 2           | 2           | 2           | 3           | 2           |
| bHLH         | 102         | 92          | 143         | 102         | 108         | 137         | 135         |
| bZIP         | 55          | 46          | 66          | 45          | 59          | 71          | 90          |
| zf-HD        | 7           | 12          | 22          | 10          | 14          | 17          | 14          |
| <b>Total</b> | <b>1202</b> | <b>1090</b> | <b>1918</b> | <b>1330</b> | <b>1399</b> | <b>1758</b> | <b>1800</b> |



**Supplementary Table 6. Classification of receptor like kinases (RLKs) in spinach and other six plant genomes.**

| RLKs        | Spinach | Sugar<br>beet | Tomato | Grape | Watermelon | Arabidopsis | Rice |
|-------------|---------|---------------|--------|-------|------------|-------------|------|
| C-LEC       | 1       | 1             | 1      | 1     | 1          | 1           | 1    |
| CR4L        | 7       | 7             | 9      | 7     | 7          | 7           | 17   |
| CrRLK1L-1   | 15      | 14            | 28     | 10    | 16         | 15          | 18   |
| DLSV        | 131     | 22            | 116    | 186   | 58         | 91          | 147  |
| DSLX        | 0       | 0             | 0      | 0     | 0          | 1           | 0    |
| Extensin    | 7       | 7             | 6      | 6     | 6          | 5           | 6    |
| L-LEC       | 20      | 24            | 27     | 29    | 25         | 45          | 101  |
| LRK10L-2    | 8       | 5             | 15     | 11    | 4          | 13          | 44   |
| LRR-I-1     | 13      | 8             | 8      | 22    | 19         | 48          | 39   |
| LRR-I-2     | 2       | 2             | 2      | 3     | 3          | 2           | 2    |
| LRR-II      | 10      | 10            | 13     | 14    | 12         | 14          | 12   |
| LRR-III     | 33      | 29            | 44     | 34    | 36         | 47          | 45   |
| LRR-IV      | 3       | 3             | 2      | 2     | 3          | 3           | 3    |
| LRR-IX      | 5       | 6             | 8      | 6     | 6          | 5           | 3    |
| LRR-V       | 7       | 6             | 9      | 8     | 8          | 9           | 12   |
| LRR-VI-1    | 4       | 4             | 6      | 5     | 5          | 5           | 4    |
| LRR-VI-2    | 5       | 5             | 6      | 5     | 5          | 8           | 10   |
| LRR-VII-1   | 4       | 4             | 5      | 4     | 5          | 5           | 8    |
| LRR-VII-2   | 1       | 1             | 2      | 2     | 2          | 3           | 3    |
| LRR-VII-3   | 2       | 2             | 3      | 2     | 1          | 2           | 1    |
| LRR-VIII-1  | 8       | 11            | 11     | 5     | 5          | 8           | 9    |
| LRR-XI-1    | 37      | 37            | 53     | 81    | 40         | 34          | 49   |
| LRR-XI-2    | 2       | 2             | 3      | 1     | 2          | 2           | 2    |
| LRR-XII-1   | 22      | 18            | 55     | 34    | 19         | 8           | 100  |
| LRR-XIIIa   | 3       | 3             | 3      | 4     | 6          | 4           | 3    |
| LRR-XIIIb   | 1       | 1             | 2      | 2     | 2          | 3           | 3    |
| LRR-XIV     | 1       | 1             | 2      | 2     | 3          | 2           | 3    |
| LRR-XV      | 2       | 2             | 2      | 1     | 2          | 2           | 2    |
| LRR-Xa      | 4       | 4             | 6      | 5     | 2          | 4           | 3    |
| LRR-Xb-1    | 10      | 6             | 10     | 8     | 7          | 9           | 24   |
| LRR-Xb-2    | 1       | 1             | 2      | 1     | 1          | 1           | 1    |
| LysM        | 15      | 15            | 16     | 12    | 11         | 6           | 12   |
| PERK-1      | 15      | 13            | 14     | 8     | 7          | 15          | 11   |
| PERK-2      | 3       | 3             | 6      | 8     | 4          | 3           | 3    |
| RKF3        | 6       | 3             | 2      | 3     | 2          | 2           | 3    |
| RLCK-II     | 1       | 2             | 2      | 1     | 2          | 1           | 1    |
| RLCK-IV     | 4       | 3             | 3      | 3     | 3          | 3           | 6    |
| RLCK-IXa    | 1       | 1             | 2      | 4     | 1          | 2           | 3    |
| RLCK-IXb    | 14      | 18            | 16     | 11    | 13         | 20          | 26   |
| RLCK-Os     | 1       | 2             | 0      | 4     | 2          | 0           | 8    |
| RLCK-V      | 9       | 8             | 8      | 8     | 9          | 11          | 14   |
| RLCK-VI     | 11      | 10            | 15     | 14    | 13         | 14          | 10   |
| RLCK-VIII   | 7       | 5             | 7      | 4     | 5          | 11          | 10   |
| RLCK-VIIa-1 | 12      | 13            | 19     | 13    | 12         | 15          | 15   |
| RLCK-VIIa-2 | 32      | 20            | 37     | 26    | 32         | 33          | 38   |

|              |    |    |    |    |    |    |     |
|--------------|----|----|----|----|----|----|-----|
| RLCK-VIIb    | 1  | 1  | 0  | 1  | 1  | 1  | 1   |
| RLCK-X       | 3  | 1  | 2  | 3  | 2  | 4  | 3   |
| RLCK-XI      | 3  | 3  | 3  | 3  | 3  | 4  | 3   |
| RLCK-XII-1   | 6  | 6  | 7  | 7  | 8  | 13 | 5   |
| RLCK-XII-2   | 1  | 9  | 2  | 5  | 0  | 13 | 0   |
| RLCK-XIII    | 1  | 1  | 2  | 1  | 1  | 2  | 5   |
| RLCK-XV      | 1  | 1  | 3  | 2  | 4  | 2  | 4   |
| RLCK-XVI     | 1  | 1  | 1  | 1  | 1  | 1  | 1   |
| RLCK-XVII    | 0  | 0  | 0  | 0  | 0  | 2  | 0   |
| SD-2b        | 29 | 34 | 39 | 34 | 23 | 10 | 105 |
| Singleton    | 1  | 1  | 1  | 1  | 1  | 1  | 0   |
| URK-1        | 2  | 2  | 3  | 2  | 2  | 3  | 3   |
| URK-2        | 0  | 0  | 3  | 3  | 1  | 0  | 3   |
| URK-3        | 1  | 0  | 1  | 1  | 0  | 1  | 1   |
| WAK          | 44 | 51 | 14 | 19 | 8  | 21 | 122 |
| WAK_LRK10L-1 | 12 | 13 | 19 | 10 | 13 | 9  | 8   |

---

**Supplementary Table 7. Summary of transcriptome SNPs and small indels in spinach accessions and different sub-groups.**

| Group         | Sample                                              | Sample size | Genotype percentage | No. small indels | No. SNPs | Total   |
|---------------|-----------------------------------------------------|-------------|---------------------|------------------|----------|---------|
| <b>Total</b>  | all three species                                   | 120         | All <sup>a</sup>    | 12,618           | 420,545  | 433,163 |
|               |                                                     |             | 50% <sup>b</sup>    | 6,229            | 274,399  | 280,628 |
|               |                                                     |             | 90% <sup>c</sup>    | 3,048            | 142,941  | 145,989 |
| <b>Sub1</b>   | <i>S. oleracea</i>                                  | 107         | All <sup>a</sup>    | 6,333            | 192,515  | 198,848 |
|               |                                                     |             | 50% <sup>b</sup>    | 2,339            | 115,401  | 117,740 |
|               |                                                     |             | 90% <sup>c</sup>    | 829              | 50,872   | 51,701  |
| <b>Sub2</b>   | <i>S. tetrandra</i><br>(excluding Sp39 and Sp40)    | 3           | All <sup>a</sup>    | 2,652            | 117,299  | 119,951 |
|               |                                                     |             | 90% <sup>c</sup>    | 1,618            | 88,027   | 89,645  |
| <b>Sub3</b>   | <i>S. turkestanica</i><br>(excluding Sp47 and Sp48) | 6           | All <sup>a</sup>    | 1,958            | 51,977   | 53,935  |
|               |                                                     |             | 50% <sup>b</sup>    | 1,543            | 44,132   | 45,675  |
|               |                                                     |             | 90% <sup>c</sup>    | 419              | 16,081   | 16,500  |
| <b>Sub2_1</b> | <i>S. tetrandra</i>                                 | 5           | All <sup>a</sup>    | 5,167            | 200,401  | 205,568 |
|               |                                                     |             | 50% <sup>b</sup>    | 4,168            | 171,621  | 175,789 |
|               |                                                     |             | 90% <sup>c</sup>    | 1,608            | 86,693   | 88,301  |
| <b>Sub3_1</b> | <i>S. turkestanica</i>                              | 8           | All <sup>a</sup>    | 2,323            | 64,347   | 66,670  |
|               |                                                     |             | 50% <sup>b</sup>    | 1,631            | 50,648   | 52,279  |
|               |                                                     |             | 90% <sup>c</sup>    | 408              | 17,199   | 17,607  |

<sup>a</sup>All SNPs without filtering based on missing genotype rate

<sup>b</sup>Excluding SNPs and small indels with more than 50% missing genotype rate

<sup>c</sup>Excluding SNPs and small indels with more than 10% missing genotype rate

**Supplementary Table 8. Summary of potential effects of SNPs and small indels.**

|                                                         | <b>No. SNPs</b>         | <b>No. Genes</b> |
|---------------------------------------------------------|-------------------------|------------------|
| Upstream (2 kb upstream of translational start site)    | 33,020                  | 8,306            |
| Downstream (2 kb downstream of translational stop site) | 46,133                  | 9,994            |
| Intergenic                                              | 23,060                  | 0                |
| Splice site acceptor or donor                           | 5,524                   | 3,099            |
| Intronic                                                | 39,420                  | 7,909            |
| Synonymous                                              | 154,349                 | 15,236           |
| Non-synonymous                                          | 117,029                 | 15,682           |
| Stop codon <==> Non-stop codon                          | 1,669                   | 1,515            |
| Start codon => Non-start codon                          | 133                     | 120              |
| Stop codon change <sup>a</sup>                          | 145                     | 145              |
| Start codon change <sup>b</sup>                         | 51                      | 51               |
| Undetermined <sup>c</sup>                               | 12                      | 6                |
| Total                                                   | 420,545                 | 18,540           |
|                                                         | <b>No. small indels</b> | <b>No. Genes</b> |
| Upstream (2 kb upstream of translational start site)    | 2,715                   | 1,991            |
| Downstream (2 kb downstream of translational stop site) | 3,649                   | 2,602            |
| Intergenic                                              | 1,025                   | 0                |
| Intronic                                                | 2,792                   | 1,946            |
| Frame shift or indel of an amino acid                   | 2,437                   | 1,358            |
| Total                                                   | 12,618                  | 6,389            |

<sup>a</sup> A stop codon changes to another stop codon

<sup>b</sup> A start codon changes to another start codon

<sup>c</sup> Undetermined base in the reference genome sequence

**Supplementary Table 9. Genetic diversity in different spinach populations**

| <b>Group Description</b>                                       | <b>Species</b>                                  | <b>No. accessions</b> | <b><math>\pi</math> per kb</b> |
|----------------------------------------------------------------|-------------------------------------------------|-----------------------|--------------------------------|
| All cultivars                                                  | <i>S. oleracea</i>                              | 107                   | 0.6687                         |
| All wild                                                       | <i>S. turkestanica</i> &<br><i>S. tetrandra</i> | 13                    | 4.1554                         |
| Wild accessions (excluding Sp47 & Sp48)                        | <i>S. turkestanica</i> &<br><i>S. tetrandra</i> | 11                    | 4.6847                         |
| Wild <i>S. turkestanica</i> accessions                         | <i>S. turkestanica</i>                          | 8                     | 0.8217                         |
| Wild <i>S. turkestanica</i> accessions (excluding Sp47 & Sp48) | <i>S. turkestanica</i>                          | 6                     | 0.8323                         |
| Wild <i>S. tetrandra</i> accessions                            | <i>S. tetrandra</i>                             | 5                     | 7.2573                         |
| Wild <i>S. tetrandra</i> accessions (excluding Sp39 & Sp40)    | <i>S. tetrandra</i>                             | 3                     | 6.4027                         |

### **Supplementary Note 1. Genetic map construction and genome anchoring**

An F2 mapping population, consisting of 109 individuals, were generated by crossing a pair of F1 siblings, which were derived from a cross between Sp75 (male), the line used to generate the reference genome sequence, and a gynocious line Sp73 (female). All the plant materials were grown in the greenhouse of Shanghai Normal University in the spring of 2015. Genomic DNA was extracted from young healthy leaves of F2 individuals and the parents using the cetyltrimethylammonium bromide (CTAB) method. DNA concentration was measured using an ND-2000 spectrophotometer (NanoDrop, Wilmington, DE, USA) and quality was assessed by electrophoresis using 1% agarose gels with a lambda DNA standard. Genotyping of these plants was performed following the genotyping-by-sequencing (GBS) protocol<sup>1</sup>, using ApeKI as the restriction enzyme. The resulting libraries were multiplexed and sequenced on a HiSeq 2500 system (Illumina Inc. USA) with single-end mode and read length of 100 bp. The GBS reads were mapped to the spinach reference genome sequence using bwa aln<sup>2</sup> (v0.7.12) with default parameters. We compared and used three different programs, GATK<sup>3</sup> (v3.6-0-g89b7209), TASSEL-GBS (v2) and TASSEL-GBS<sup>4</sup> (v1), to identify SNPs from the GBS data. The minimum genotype quality was set to 60 for both TASSEL pipelines and 30 for the GATK pipeline. The resulting SNPs from the three programs were integrated and concatenated, and a total of 21,792 biallelic SNPs were obtained. The segregation ratio tests (1:2:1) were performed on these SNPs using the Chi-square analysis ( $P < 0.001$ ), resulting in the removal of 86% of the biallelic SNPs. SNP sites with missing genotype rate greater than 0.3 were excluded from the analysis and adjacent SNP sites (distance smaller than 1 Mb) with uniform genotype patterns across the population were grouped as one SNP marker. A total of 870 markers were used to construct a linkage map using the minimum spanning tree (MST) algorithm<sup>5</sup> implemented in the R package ASMap (<https://cran.r-project.org/web/packages/ASMap/>).

The resulting genetic map consisted of six linkage groups (LGs), corresponding to the six spinach chromosomes. The LGs had an estimated total genetic length of 3679.4 cM and an average of approximately 4.23 cM per marker (**Supplementary Fig. 3**).

Using the newly generated genetic map, we were able to anchor 439 scaffolds to the six spinach LGs, covering 463.4 Mb (47%) of the 996 Mb assembled genome and more than 60% of the total gene space (**Supplementary Fig. 3**). We manually checked the assembled scaffolds that were not consistent with LGs, by examining the alignments of the mate-pair reads from two

large-insert libraries (10 kb and 15 kb). Six scaffolds with conflicting marker positions on LGs were broken based on the evidence from the alignments (**Supplementary Fig. 4**). Several other inconsistencies between genetic map and the genome scaffolds could still be observed (**Supplementary Fig. 3**), which could be mainly due to the errors introduced during genetic map construction.

Furthermore, we compared a previously published spinach genetic map<sup>6</sup>, which consists of 283 SNP makers, to our genome assembly. A total of 279 markers could be uniquely mapped to the assembly, which anchored 87 scaffolds of a total length of 130.3 Mb (13% of the assembled genome), among which 123.8 Mb (95% of 130.3 Mb) were largely consistent with our anchoring results (**Supplementary Fig. 5**), supporting the high accuracy of our genome anchoring. Since only a very small portion of scaffolds (6.5 Mb) that were anchored by the genetic map of Chan-Navarrete et al.<sup>6</sup> were not covered by our pseudochromosomes, no further effort was made to integrate the 6.5-Mb scaffolds into our final pseudochromosomes.

The rate (47%) of assembled spinach scaffolds that could be anchored to the genetic map is relatively low. This could be due mainly to the following two reasons: 1) the genetic diversity between the two parents, both of which are cultivated species, is very low. This is the same for the genetic map of Chan-Navarrete et al.<sup>6</sup>; and 2) spinach is a naturally dioecious species, therefore the F2 population in our mapping population had to be generated by crossing two F1 siblings with different sex types. This could be the main reason that a large portion of the SNP markers (86%) that did not pass the segregation ratio test (1:2:1;  $p < 0.001$ ). Mapping populations derived from parents that are distantly related, e.g., one cultivated and one wild species, would greatly help to generate high-density genetic maps for spinach. However, currently very limited number of accessions are available for the two wild relatives of spinach, *Spinacia turkestanica* and *S. tetrandra*. In addition, progenies from crosses of cultivated and wild (especially *S. tetrandra*) spinaches often show highly reduced pollen fertility<sup>7</sup>, make it difficult to develop mapping populations with high genetic diversity.

## Supplementary References

1. Elshire, R. J., *et al.* A robust, simple genotyping-by-sequencing (GBS) approach for high diversity species. *PLoS One* **6**, e19379 (2011).
2. Li, H. & Durbin, R. Fast and accurate short read alignment with Burrows-Wheeler transform. *Bioinformatics* **25**, 1754-1760 (2009).
3. McKenna, A., *et al.* The Genome Analysis Toolkit: a MapReduce framework for analyzing next-generation DNA sequencing data. *Genome Res.* **20**, 1297-1303 (2010).
4. Glaubitz, J. C., *et al.* TASSEL-GBS: a high capacity genotyping by sequencing analysis pipeline. *PLoS One* **9**, e90346 (2014).
5. Wu, Y., Bhat, P., Close, T. J. & Lonardi, S. Efficient and accurate construction of genetic linkage maps from minimum spanning tree of a graph. *PLoS Gen.* **4**, 1-11 (2008).
6. Chan-Navarrete, R., Dolstra, O., van Kaauwen, M., Lammerts van Bueren, E. T. & van der Linden, C. G. Genetic map construction and QTL analysis of nitrogen use efficiency in spinach (*Spinacia oleracea* L.). *Euphytica* **208**, 621-636 (2015).
7. Fujito, S., Takahata, S., Suzuki, R., Hoshino, Y., Ohmido, N. & Onodera, Y. Evidence for a common origin of homomorphic and heteromorphic sex chromosomes in distinct *Spinacia* species. *G3* **5**, 1663-1673 (2015).
